# Supplementary material for: Allosteric Feedback Inhibition Enables Robust Amino Acid Biosynthesis in E. coli by Enforcing Enzyme Overabundance
Source: PubMed Central journal article supplement — Cell Syst. 2019 Jan 23;8(1):66–75.e8. doi: 10.1016/j.cels.2018.12.005 (PMC6345581; doi:10.1016/j.cels.2018.12.005), 2019-01-23
Supplement: mmc1.pdf [file mmc1.pdf]

**Cell Systems, Volume 8**

**Supplemental Information**

**Allosteric Feedback Inhibition Enables  
Robust Amino Acid Biosynthesis in *E. coli*  
by Enforcing Enzyme Overabundance**

**Timur Sander, Niklas Farke, Christoph Diehl, Michelle Kuntz, Timo Glatter, and Hannes Link**

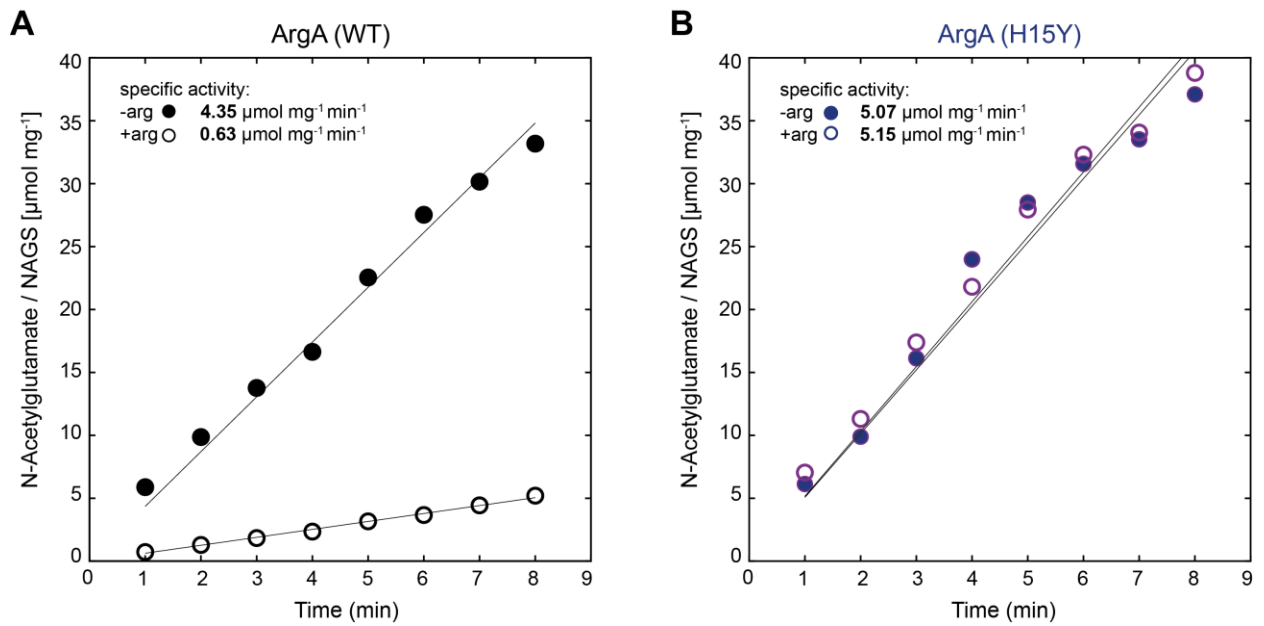

**Figure S1. Related to Figure 1; *In vitro* kinetics of N-acetylglutamate-synthase (NAGS) from *E. coli* (ArgA) in the **A** native and **B** the allosteric feedback resistant version ArgA (H15Y). Dots represent means from n=2 independent assays (filled = no arginine; empty = 1 mM arginine). Activity of His-tagged purified enzymes was assayed in 30 mM TRIS buffer (40 mM L-glutamate, 0.65 mM Acetyl-CoA and 10 mM MgCl<sub>2</sub>). For sampling 10  $\mu\text{L}$  of reaction solution was transferred into 40  $\mu\text{L}$  of 50:50 (v-%) acetonitrile/methanol at -20°C. The reaction product N-acetylglutamate was measured by LC-MS/MS. Specific activity in [ $\mu\text{mol mg}^{-1} \text{min}^{-1}$ ] was calculated from linear regression through the 8 time points.**

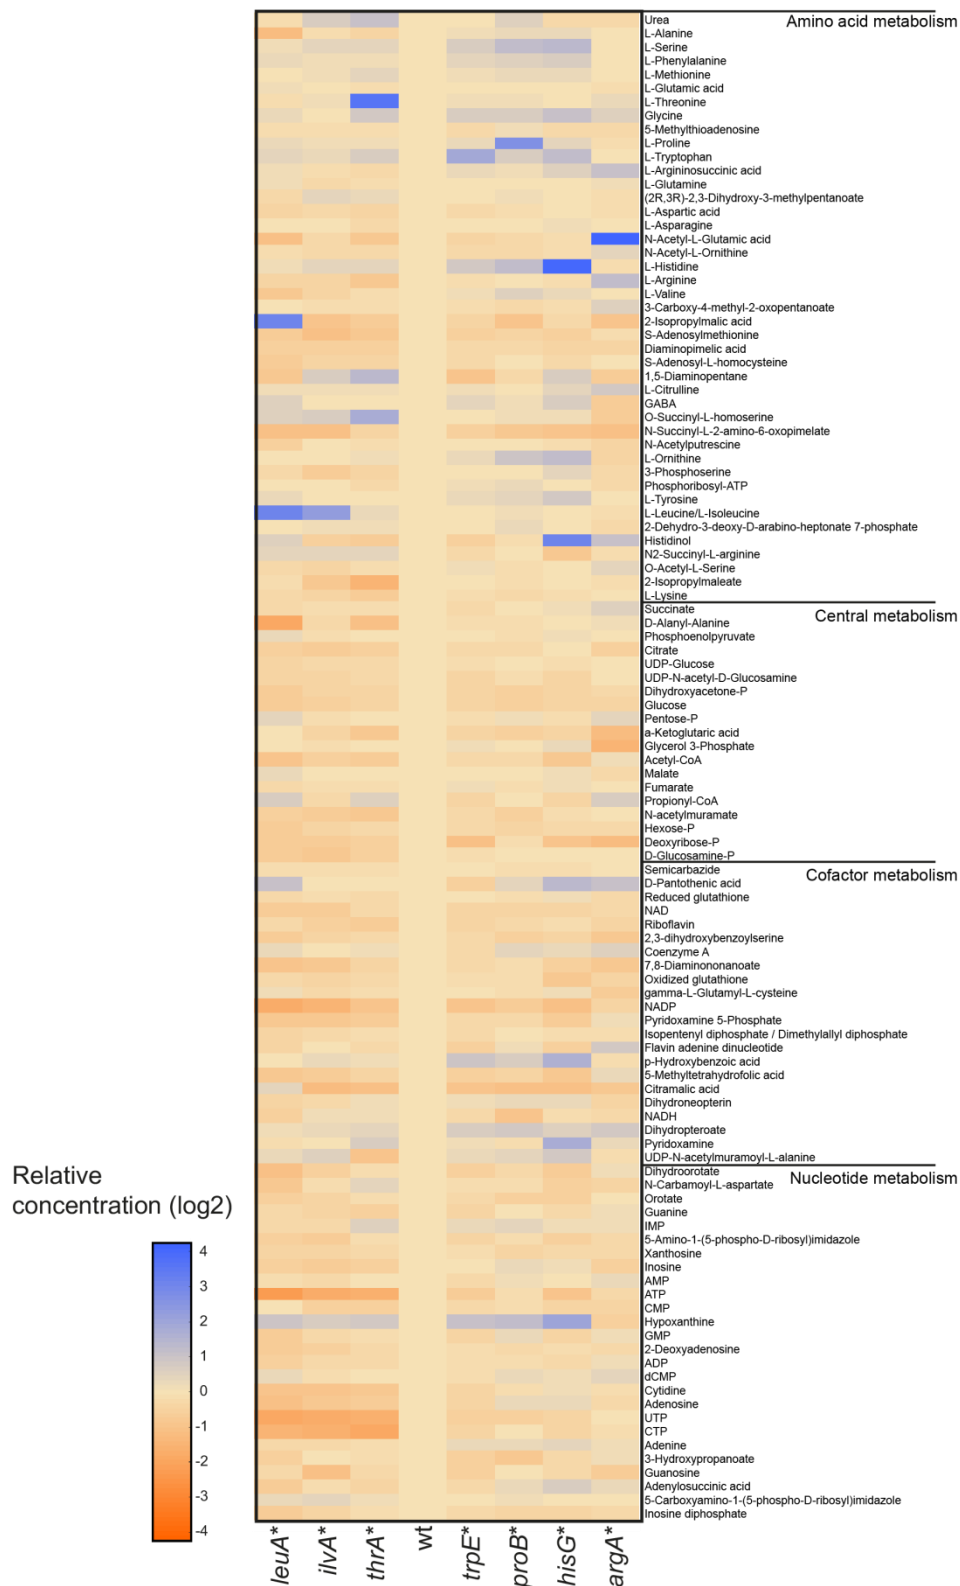

**Figure S2. Related to Figure 1;** Relative concentrations of 110 intracellular metabolites in wild-type *E. coli* and seven dysregulated mutants (n = 3).

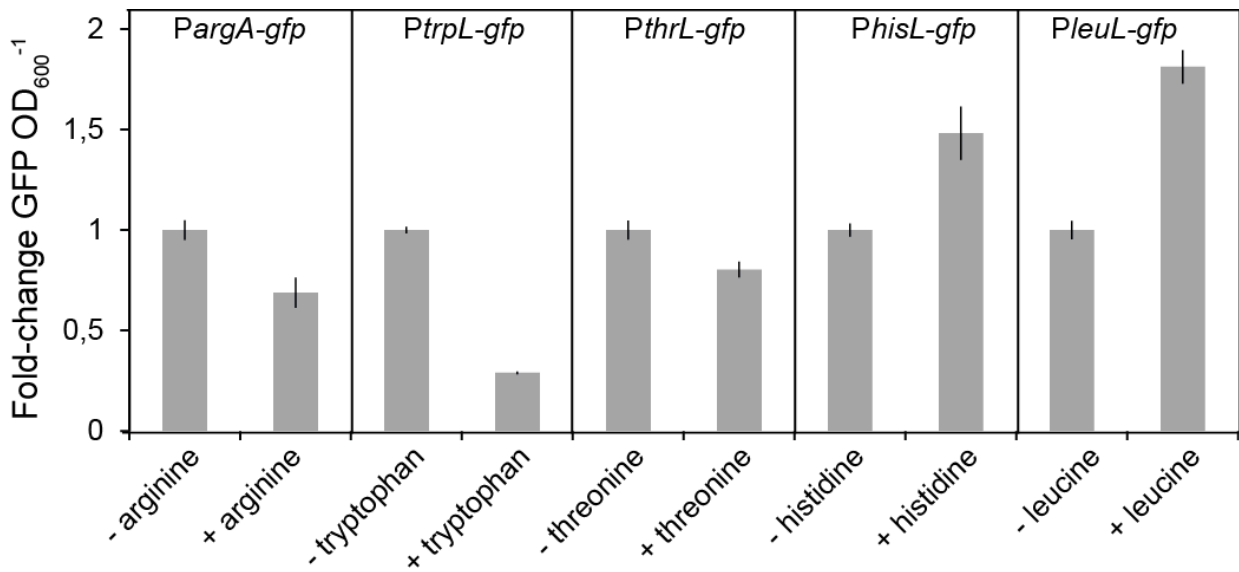

**Figure S3. Related to Figure 2;** GFP expression of promotor fusions *PargA-gfp*, *PtrpL-gfp*, *PthrL-gfp*, *PhisL-gfp* and *PleuL-gfp* in *E. coli* wild-type with and without addition of external amino acids. Bar plots show fold-changes of GFP per  $OD_{600}$  relative to the condition without external amino acids ( $n=3$ ). Cells were grown in M9 minimal medium ( $5 \text{ g L}^{-1}$  glucose) and GFP expression was measured in mid-exponential phase at  $OD_{600} \sim 0.5$  with a plate reader. Amino acids were supplemented to a final concentration of 2 mM.

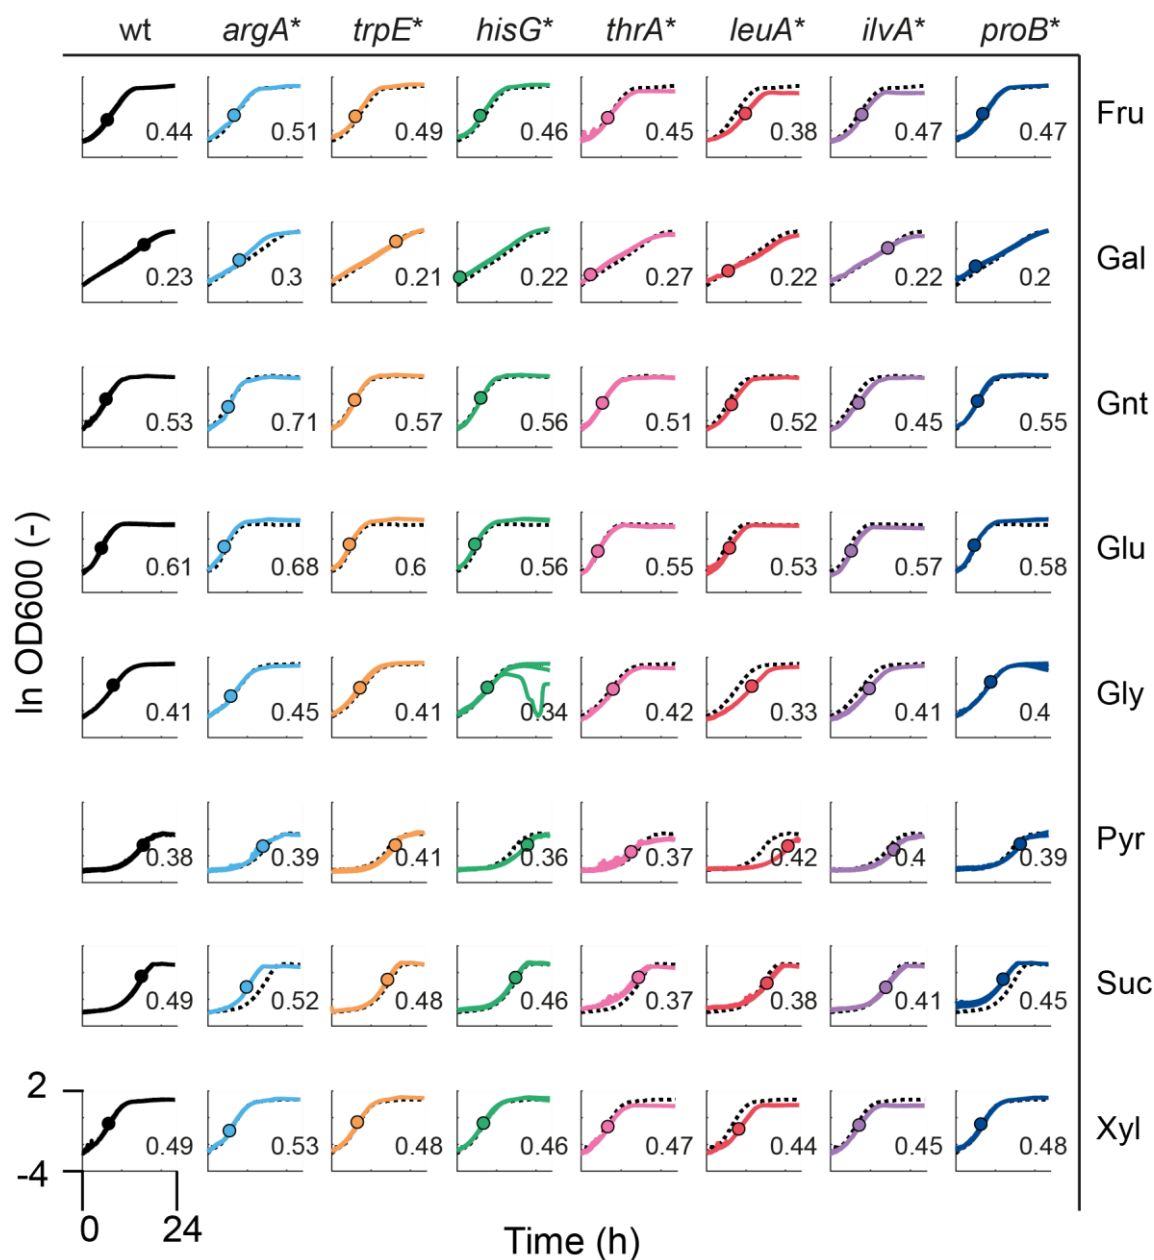

**Figure S4. Related to Figure 3;** Growth of wild-type *E. coli* and 7 mutants (see also Figure 1A) on fructose (Fru), galactose (Gal), gluconate (Gnt), glucose (Glu), glycerol (Gly), pyruvate (Pyr), succinate (Suc), and xylose (Xyl). Shown are three cultivations in microtiter plates. The dashed line is the mean of the wild-type in the particular condition ( $n = 3$ ). Numbers are the maximal growth rates in  $\text{h}^{-1}$ , which is reached at the time indicated by dots. All x-axes range from 0 to 24 hours. All y-axes range from -4 to 2 ( $\ln\text{OD}_{600}$ ).

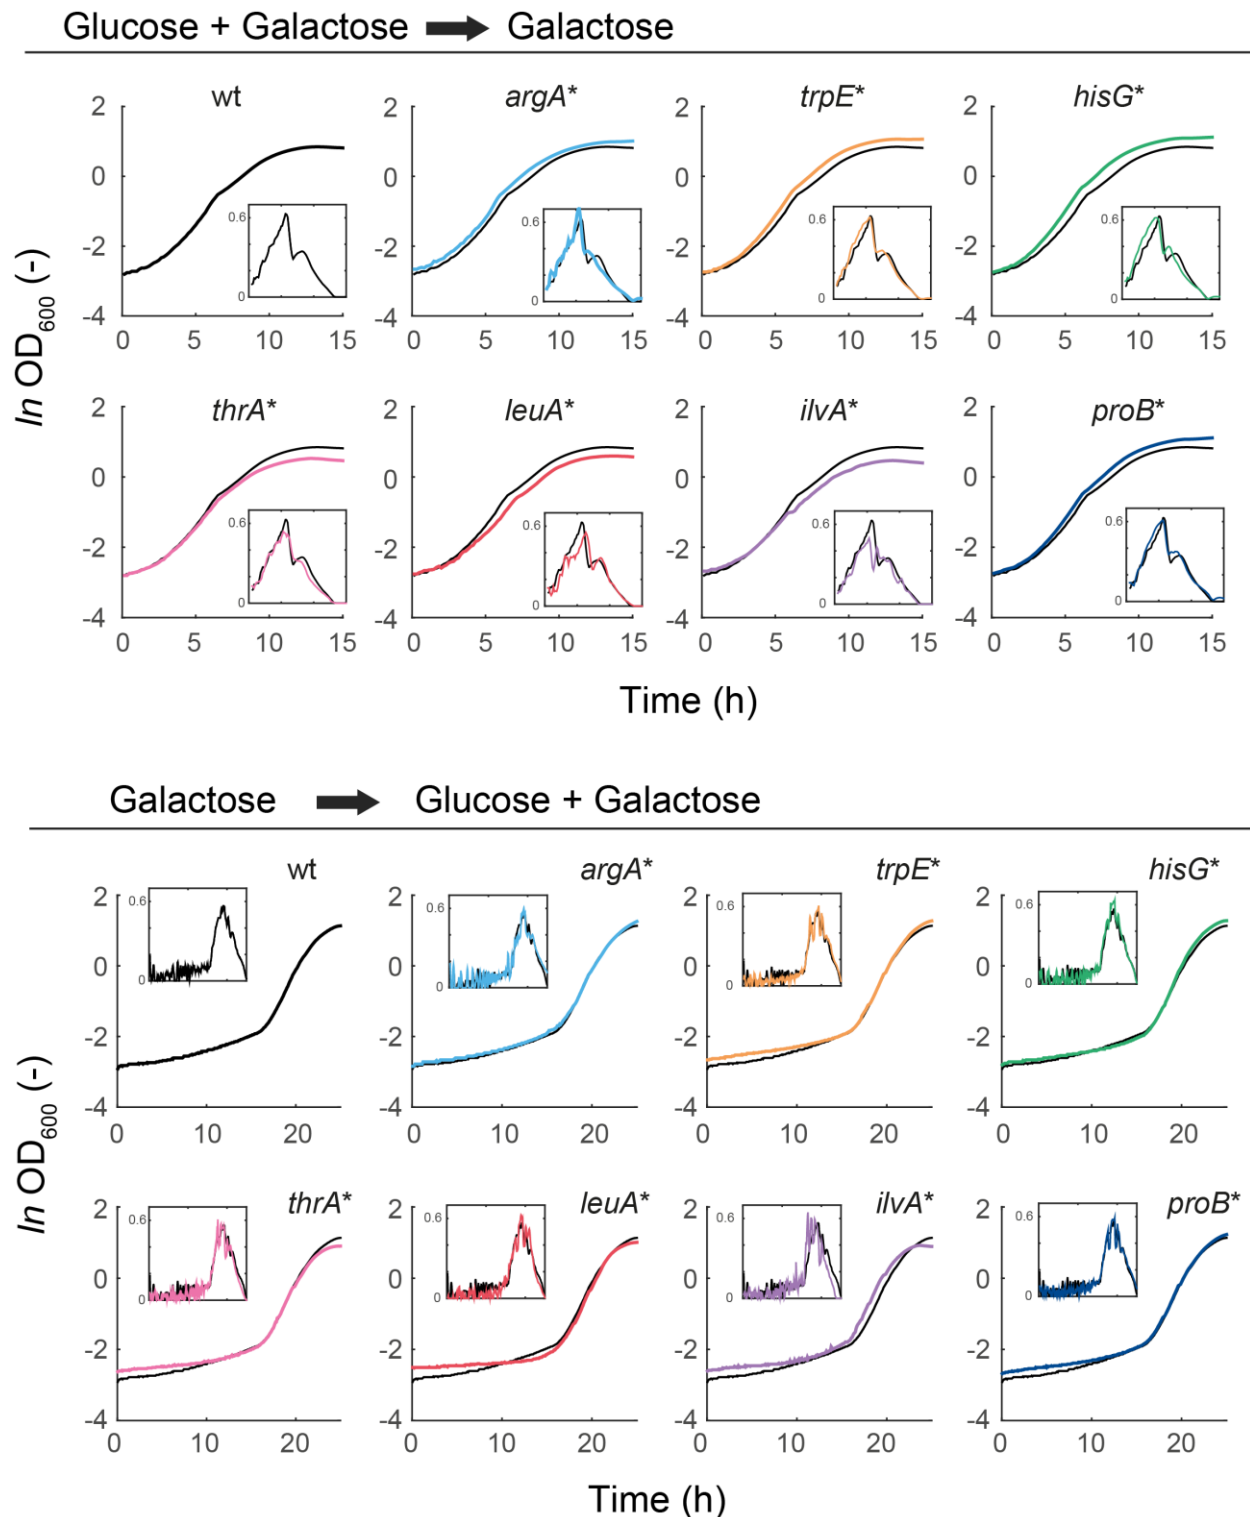

**Figure S5. Related to Figure 3;** Growth of wild-type *E. coli* and the seven dysregulated mutants in shifts between glucose and galactose. For down-shifts from glucose to galactose, cells were grown in M9 minimal medium with 0.5 g L<sup>-1</sup> glucose and 5 g L<sup>-1</sup> galactose. For up-shifts from galactose to glucose, cells were grown in M9 minimal medium with 5 g L<sup>-1</sup> galactose and glucose was added to a final concentration of 5 g L<sup>-1</sup> at an OD of 0.1. Shown are means of  $n = 3$  cultures. Inserts show the growth rate during the same time period. Growth rates were estimated by linear regression over a moving 30 minute window. The same wild-type growth curve is shown in each graph in black as a reference.

### Arginine intermediates

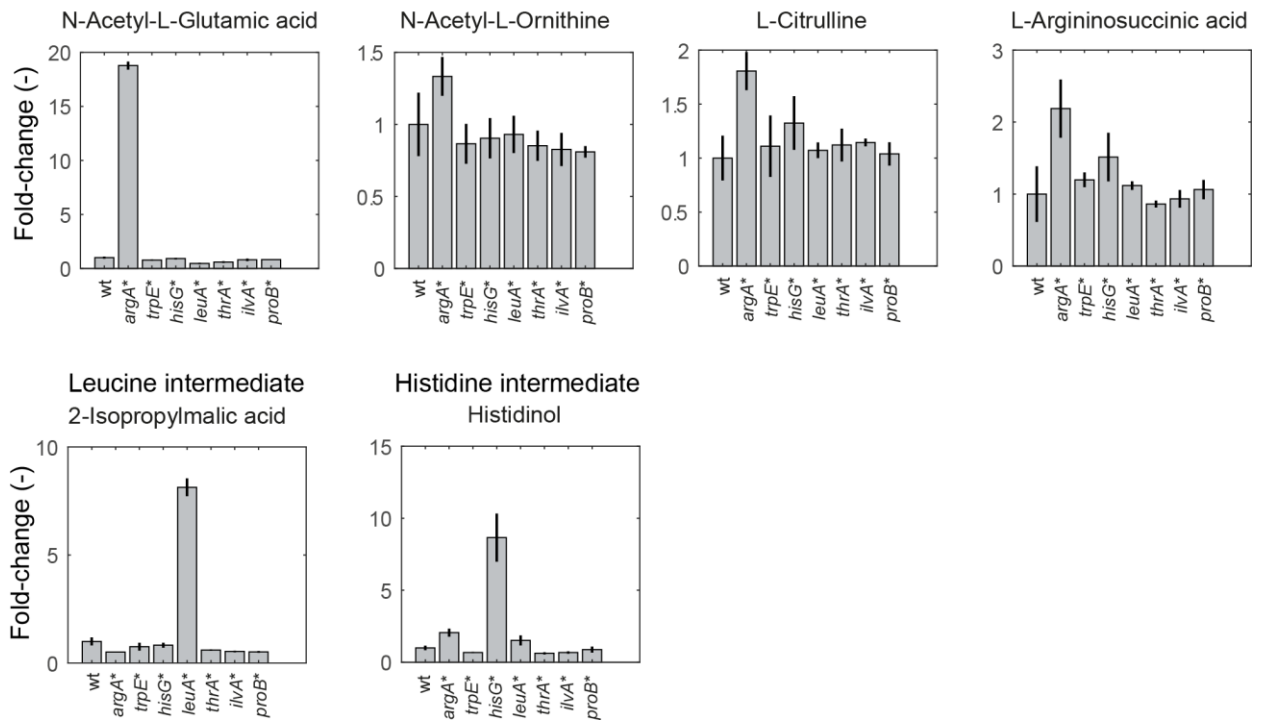

**Figure S6. Related to Figure 4;** Intermediates in dysregulated pathways measured by LC-MS in wild-type *E. coli* and seven dysregulated mutants (n = 3).

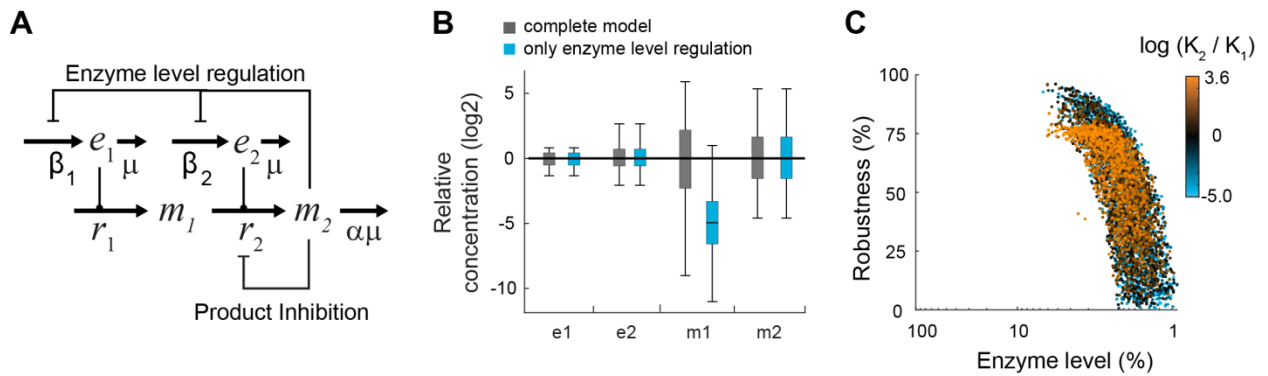

**Figure S7. Related to Figure 4;**

(A) Model with product inhibition, instead of allosteric feedback inhibition. Metabolite 2 inhibits reaction 2 by competitive product inhibition, which was modelled using the following equation:

$$r_2 = k_{cat,2} \cdot e_2 \cdot \frac{m_1}{m_1 + Km \cdot \left(1 + \frac{m_2}{K_1}\right)}$$

(B) Steady state concentrations of  $e_1$ ,  $e_2$ ,  $m_1$  and  $m_2$  calculated with 5000 simulations for the complete model (grey), and the model with only enzyme level regulation (blue). Boxes contain 50% and whiskers 99% of the simulated concentrations. All concentrations are normalized to the median concentrations of the complete model.

(C) Enzyme levels (sum of  $e_1$  and  $e_2$ ) and robustness against perturbations of  $\beta_{2,max}$  for 5000 simulations of the complete model (dots). The color of each dot shows the ratio of inhibition constants for allosteric feedback inhibition ( $K_1$ ) and enzyme level regulation ( $K_2$ ) in the respective model. Robustness corresponds to the percentage downregulation of  $\beta_{2,max}$  that was tolerated by each model. 100% enzyme abundance corresponds to the maximum theoretical enzyme concentration in the model.



**Table S1. Related to Figure 1;** Mutations in allosteric enzymes that were investigated in this study.

| Pathway                   | Gene        | Enzyme                         | Mutation | Reference                   |
|---------------------------|-------------|--------------------------------|----------|-----------------------------|
| L-arginine biosynthesis   | <i>argA</i> | N-acetylglutamate synthase     | H15Y     | Rajagopal et al., 1998      |
| L-isoleucine biosynthesis | <i>ilvA</i> | Threonine deaminase            | L447F    | LaRossa et al., 1987        |
| L-histidine biosynthesis  | <i>hisG</i> | ATP phosphoribosyl transferase | E271K    | Doroshenko et al., 2013     |
| L-leucine biosynthesis    | <i>leuA</i> | 2-isopropylmalate synthase     | G462D    | Gusyatiner et al., 2002     |
| L-proline biosynthesis    | <i>proB</i> | Glutamate-5-kinase             | D107N    | Csonka et al., 1988         |
| L-threonine biosynthesis  | <i>thrA</i> | Aspartate kinase               | S345F    | Lee et al., 2003            |
| L-tryptophan biosynthesis | <i>trpE</i> | Anthranilate synthase          | S40F     | Caligiuri and Bauerle, 1991 |

**Table S2. Related to Figure 1; Oligonucleotides for recombineering**

| Gene        | Oligonucleotides for recombineering (5'-3')                                                                 | Protospacer sequence (5'-3') |
|-------------|-------------------------------------------------------------------------------------------------------------|------------------------------|
| <i>argA</i> | GTGGTAAAGGAACGTAAAACCGAGTTGGTCGAGGGAT<br>TCCGC <b>I</b> ATTC <b>A</b> GTTCCCTATATCAATACCCACCGGGGAA          | GGTCGAGGGATT<br>CCGCCATT     |
| <i>ilvA</i> | GGAATCACCGGGCGCG <b>I</b> T <b>C</b> CTGCGCTT <b>I</b> CTCAACACG<br>CTGGGTACGTACTGGAACATTTCTTTGTTCCACTATCG  | CAACACGCTGG<br>GTACGTACT     |
| <i>hisG</i> | GTCAGCAGC <b>A</b> AAACCCTGTTCTGGGAAAC <b>I</b> ATGGAAA<br>AACTGAAAGCGCTGGGGCCAGTTCAATTCTGGTCCTG            | TGGAAAACTGA<br>AAGCGCTG      |
| <i>leuA</i> | CTGGTGAAATACAGCCTGACCGCCAAAGG <b>A</b> CACGGTA<br>AAGATGCGCTGG <b>A</b> TCAGGTGGATATCGTCGCTAACTAC           | CGGTAAAGATGC<br>GCTGGGTC     |
| <i>proB</i> | ACCCGTGCT <b>A</b> ATATGGAAGACCGTGAACGCTTCCTGAACG<br><b>C</b> <b>I</b> CGCGACACCCTGCGAGCGTTGCTCGATAACAATATC | CGACACCCTGCG<br>AGCGTTGC     |
| <i>thrA</i> | GCGCGCGTCTTTGCAGCGATGTCACGCGCCCGTATTT<br><b>I</b> CGTGGTGCTGATTACGCAATCATCTTCCGAATACAGC                     | TGGTGCTGATTA<br>CGCAATCA     |
| <i>trpE</i> | CTTATCGCGACAATCCCAC <b>I</b> GCGCTTTTTCACCAGTTGTGT<br>GGGATCGTCCGGCAACGCTGCTGCTGGAAT <b>I</b> CGCAGAT       | CGCTTTTTCACC<br>AGTTGTGT     |

**Table S3. Related to Figure 4; Literature  $k_{cat}$  values for enzymes in amino acid biosynthesis.** The values were collected from the BRENDA database, and from Davidi and Milo, 2017. - indicates that no value could be found in both sources. The 25<sup>th</sup> and 75<sup>th</sup> quartiles of these  $k_{cat}$  values are 930 min<sup>-1</sup> and 4140 min<sup>-1</sup>, respectively.

| Name | $k_{cat}$ , s <sup>-1</sup> | Name | $k_{cat}$ , s <sup>-1</sup> | Name | $k_{cat}$ , s <sup>-1</sup> |
|------|-----------------------------|------|-----------------------------|------|-----------------------------|
| argA | 654.00                      | cysK | 378.50                      | ilvN | 40.00                       |
| argB | -                           | cysM | 24.00                       | leuA | -                           |
| argC | -                           | cysN | -                           | leuB | 69.00                       |
| argD | -                           | cysQ | 11.00                       | leuC | -                           |
| argE | 1800.00                     | dadX | 33.66                       | leuD | -                           |
| argF | -                           | dapA | 104.00                      | lysA | 33.00                       |
| argG | -                           | dapB | 382.00                      | lysC | 22.13                       |
| argH | -                           | dapD | 36.00                       | metA | 22.00                       |
| argI | -                           | dapE | -                           | metB | 121.00                      |
| aroA | 32.00                       | dapF | 84.00                       | metC | 34.10                       |
| aroB | 14.00                       | gdhA | 37.00                       | metE | 3.50                        |
| aroC | 39.00                       | glnA | 33.00                       | metH | -                           |
| aroD | 75.00                       | gltB | -                           | metL | -                           |
| aroE | 237.00                      | gltD | -                           | pheA | 32.00                       |
| aroF | -                           | glyA | 10.00                       | proA | 10.00                       |
| aroG | 4.20                        | hisA | 7.20                        | proB | 53.00                       |
| aroH | -                           | hisB | -                           | proC | 717.00                      |
| aroK | -                           | hisC | -                           | prs  | -                           |
| aroL | -                           | hisD | 12.00                       | serA | 29.00                       |
| asd  | -                           | hisF | -                           | serB | -                           |
| asnA | -                           | hisG | -                           | serC | 1.80                        |
| asnB | 4.50                        | hisH | -                           | thrA | -                           |
| aspC | -                           | hisI | -                           | thrB | 17.00                       |
| avtA | -                           | ilvA | -                           | thrC | -                           |
| cysC | 50.00                       | ilvB | 38.50                       | trpA | -                           |
| cysD | -                           | ilvC | 0.30                        | trpB | -                           |
| cysE | 772.00                      | ilvD | 69.00                       | trpC | 18.77                       |
| cysH | -                           | ilvE | -                           | trpE | -                           |
| cysI | 47.00                       | ilvH | -                           | tyrA | 71.00                       |
| cysJ | -                           | ilvI | -                           | tyrB | -                           |

**Table S4. Related to Figure 4; Amino acid requirements of *E. coli* (Monk et al., 2017).**  
 The mean of 86.6 mM was used as parameter  $\alpha$  in the model.

| <b>Amino Acid</b> | <b>Coefficients, <math>\text{mmol g}_{\text{dw}}^{-1}</math></b> | <b>alpha, mM</b> |
|-------------------|------------------------------------------------------------------|------------------|
| ala-L             | 0.499                                                            | 166.4            |
| arg-L             | 0.287                                                            | 95.8             |
| asn-L             | 0.234                                                            | 78.1             |
| asp-L             | 0.234                                                            | 78.1             |
| cys-L             | 0.089                                                            | 29.7             |
| gln-L             | 0.256                                                            | 85.2             |
| glu-L             | 0.256                                                            | 85.2             |
| gly               | 0.595                                                            | 198.4            |
| his-L             | 0.092                                                            | 30.7             |
| ile-L             | 0.282                                                            | 94.1             |
| leu-L             | 0.438                                                            | 145.9            |
| lys-L             | 0.333                                                            | 111.1            |
| met-L             | 0.149                                                            | 49.8             |
| phe-L             | 0.180                                                            | 60.0             |
| pro-L             | 0.215                                                            | 71.6             |
| ser-L             | 0.210                                                            | 69.9             |
| thr-L             | 0.247                                                            | 82.2             |
| trp-L             | 0.055                                                            | 18.4             |
| tyr-L             | 0.134                                                            | 44.7             |
| val-L             | 0.411                                                            | 137.1            |
| <b>Mean</b>       | <b>0.260</b>                                                     | <b>86.6</b>      |

**Table S5. Related to Figure 4; Inhibition constants of allosteric enzymes ( $K_i$ -value), transcriptional attenuation (tRNA-ligase  $K_m$ -value) and metabolite-transcription factor interactions ( $K_d$ -value). Values were obtained from EcoCyc (Keseler et al., 2017), Brenda (Schomburg et al., 2002) or RegulonDB (Gama-Castro et al., 2016). When more than one value was available, an upper and a lower bound are given. The grey background indicates the seven pathways that were investigated during this work. The  $K_i$  of ArgA was measured in this work with *in vitro* assays.**

| Biosynthesis pathway | Allosteric Feedback |            | $K_i$ mM |       | Transcriptional Feedback |                 |            | $K_{m/d}$ mM |      |
|----------------------|---------------------|------------|----------|-------|--------------------------|-----------------|------------|--------------|------|
|                      | Enzyme              | Metabolite | LB       | UB    | Mechanism                | Protein         | Metabolite | LB           | UB   |
| Arginine             | ArgA                | arg        | 0.15     |       | Repressor                | ArgR            | arg        | 0.28         |      |
| Asparagine           | AsnA                | asn        | 0.12     |       | Repressor                | AsnC            | asn        | 1            |      |
| Cysteine             | CysE                | cys        | 0.001    |       |                          |                 |            |              |      |
| Histidine            | HisG                | his        | 0.012    | 0.1   | Attenuation              | his-tRNA ligase | his        | 0.008        | 0.03 |
| Isoleucine           | IlvA                | ile        | 0.06     |       | Attenuation              | ile-tRNA ligase | ile        | 0.0036       | 1.3  |
| Leucine              | LeuA                | leu        | 0.28     |       | Attenuation              | leu-tRNA ligase | leu        | 0.0015       | 0.05 |
| Lysine               | DapA                | lys        | 0.21     | 3.9   |                          |                 |            |              |      |
| Methionine           | MetA                | met        | 0.1      | 4     | Repressor                | MetJ            | sam        | 0.01         | 0.05 |
| Phenylalanine        | PheA                | phe        | 0.1      | 0.6   |                          | TyrR            | phe        | >0.18        |      |
| Proline              | ProB                | pro        | 0.02     |       |                          |                 |            |              |      |
| Serine               | SerA                | ser        | 0.005    | 0.37  |                          |                 |            |              |      |
| Threonine            | ThrA                | thr        | 0.097    | 0.167 | Attenuation              | thr-tRNA ligase | thr        | 0.11         | 0.2  |
| Tryptophan           | TrpE                | trp        | 0.17     |       | Repressor                | TrpR            | trp        | 0.16         |      |
| Tryptophan           | TrpE                | trp        | 0.17     |       | Attenuation              | trp-tRNA ligase | trp        | 0.017        |      |
| Tyrosine             | TyrA                | tyr        | 0.1      |       | Repressor                | TyrR            | tyr        | 0.18         |      |
| Valine               | IlvB                | val        | 0.078    | 0.1   | Attenuation              | val-tRNA ligase | val        | 0.0043       | 0.1  |

**Table S6. Related to STAR Methods; Oligonucleotides used in this study.**

| Oligonucleotide | Sequence (5'-3')                                                   | Description                                                                                                           |
|-----------------|--------------------------------------------------------------------|-----------------------------------------------------------------------------------------------------------------------|
| argA_Foward     | GGTCGAGGGATTCCGCCATTG<br>TTTTAGAGCTAGAAATAGCAAG                    | Forward primer used with <b>CPEC001</b> for amplification of fragment 1 for customized pKDsgRNA targeted against argA |
| argA_Reverse    | AATGGCGGAATCCCTCGACCG<br>TGCTCAGTATCTCTATCACTGA                    | Reverse primer used with <b>CPEC002</b> for amplification of fragment 2 for customized pKDsgRNA targeted against argA |
| ilvA_Foward     | AGTACGTACCCAGCGTGTGG<br>TTTTAGAGCTAGAAATAGCAAG                     | Forward primer used with <b>CPEC001</b> for amplification of fragment 1 for customized pKDsgRNA targeted against ilvA |
| ilvA_Reverse    | CAACACGCTGGGTACGTACTG<br>TGCTCAGTATCTCTATCACTGA                    | Reverse primer used with <b>CPEC002</b> for amplification of fragment 2 for customized pKDsgRNA targeted against ilvA |
| hisG_Foward     | CAGCGCTTTCAGTTTTCCAGT<br>TTTTAGAGCTAGAAATAGCAAG                    | Forward primer used with <b>CPEC001</b> for amplification of fragment 1 for customized pKDsgRNA targeted against hisG |
| hisG_Reverse    | TGAAAAACTGAAAGCGCTGG<br>TGCTCAGTATCTCTATCACTGA                     | Reverse primer used with <b>CPEC002</b> for amplification of fragment 2 for customized pKDsgRNA targeted against hisG |
| leuA_Foward     | GACCCAGCGCATCTTTACCGG<br>TTTTAGAGCTAGAAATAGCAAG                    | Forward primer used with <b>CPEC001</b> for amplification of fragment 1 for customized pKDsgRNA targeted against leuA |
| leuA_Reverse    | CGGTAAAGATGCGCTGGGTCCG<br>TGCTCAGTATCTCTATCACTGA                   | Reverse primer used with <b>CPEC002</b> for amplification of fragment 2 for customized pKDsgRNA targeted against leuA |
| proB_Foward     | GCAACGCTCGCAGGGTGTCGG<br>TTTTAGAGCTAGAAATAGCAAG                    | Forward primer used with <b>CPEC001</b> for amplification of fragment 1 for customized pKDsgRNA targeted against proB |
| proB_Reverse    | CGACACCCTGCGAGCGTTGCG<br>TGCTCAGTATCTCTATCACTGA                    | Reverse primer used with <b>CPEC002</b> for amplification of fragment 2 for customized pKDsgRNA targeted against proB |
| thrA_Foward     | TGATTGCGTAATCAGCACCAG<br>TTTTAGAGCTAGAAATAGCAAG                    | Forward primer used with <b>CPEC001</b> for amplification of fragment 1 for customized pKDsgRNA targeted against thrA |
| thrA_Reverse    | TGGTGCTGATTACGCAATCAG<br>TGCTCAGTATCTCTATCACTGA                    | Reverse primer used with <b>CPEC002</b> for amplification of fragment 2 for customized pKDsgRNA targeted against thrA |
| trpE_Foward     | ACACAACCTGGTAAAAAGCGG<br>TTTTAGAGCTAGAAATAGCAAG                    | Forward primer used with <b>CPEC001</b> for amplification of fragment 1 for customized pKDsgRNA targeted against trpE |
| trpE_Reverse    | CGTTTTTACCAGTTGTGTG<br>TGCTCAGTATCTCTATCACTGA                      | Reverse primer used with <b>CPEC002</b> for amplification of fragment 2 for customized pKDsgRNA targeted against trpE |
| argR_Foward     | ATTCTTCAATGGACTGGAGGG<br>TTTTAGAGCTAGAAATAGCAAG                    | Forward primer used with <b>CPEC001</b> for amplification of fragment 1 for customized pKDsgRNA targeted against argR |
| argR_Reverse    | CCTCCAGTCCATTGAAGAATGT<br>GCTCAGTATCTCTATCACTGA                    | Reverse primer used with <b>CPEC002</b> for amplification of fragment 2 for customized pKDsgRNA targeted against argR |
| CPEC001         | TTTATAACCTCCTTAGAGCTCG<br>A                                        | Reverse primer for amplification of fragment 1 for pKDsgRNA                                                           |
| CPEC002         | CCAATTGTCCATATTGCATCA                                              | Forward primer for amplification of fragment 2 for pKDsgRNA                                                           |
| Ec-F            | GTTTTAGAGCTAGAAATAGCAA<br>GTTAAAATAAGGC                            | Foward primer used with <b>guide_Rev</b> for amplification of customized pNUT1533-ctrl                                |
| Ec-F-argE-mm5   | TTTTTCATTGTTGACACCCCTC<br>GTTTTAGAGCTAGAAATAGCAA<br>GTTAAAATAAGGC  | Foward primer used with <b>guide_Rev</b> for amplification of customized pNUT1533-argE                                |
| Ec-F-trpA       | TTCTTTGCGCTCCTTCAACTGTT<br>TTAGAGCTAGAAATAGCAAGTT<br>AAAATAAGGC    | Foward primer used with <b>guide_Rev</b> for amplification of customized pNUT1533-trpA                                |
| Ec-F-hisB       | TCACTCGGCGGTTTCGCTAATCA<br>GTTTTAGAGCTAGAAATAGCAA<br>GTTAAAATAAGGC | Foward primer used with <b>guide_Rev</b> for amplification of customized pNUT1533-hisB                                |
| Ec-R            | ACTAGTATTATACCTAGGACTG<br>AGCTAGC                                  | Reverse primer for amplification of customized pNUT1533 plasmids                                                      |
| ArgA_fwd_Ndel   | TGACCATATGATGGTAAAGGAA<br>CGTAAAAC                                 | Amplification of genomic argA                                                                                         |
| ArgA_rev_BamHI  | TGACGGATCCTTACCCTAAATC<br>CGCCATCA                                 | Amplification of genomic argA                                                                                         |
| ArgA_H15Y_fwd   | AGGGAACCGAATAGCGGAATC<br>CCTC                                      | Forward primer for amplification pET28a(+)-argA                                                                       |
| ArgA_H15Y_rev   | ATATCAATACCCACCGGG                                                 | Reverse primer for amplification pET28a(+)-argA                                                                       |
| hisL_fwd_gfp    | CCGCTCGAGGCTTTCATCATTG<br>TTGCCG                                   | Forward primer for amplification of hisL attenuator region                                                            |
| hisL_rev_gfp    | CCGGGATCCCGCAGAATATCAA<br>TCGGC                                    | Reverse primer for amplification of hisL attenuator region                                                            |
| leuL_fwd_gfp    | CCGCTCGAGTTGTCCCTTTTT<br>CCTCG                                     | Forward primer for amplification of leuL attenuator region                                                            |

**Table S6. Related to STAR Methods; continued**

| <b>Oligonucleotide</b> | <b>Sequence (5'-3')</b>         | <b>Description</b>                                         |
|------------------------|---------------------------------|------------------------------------------------------------|
| leuL_rev_gfp           | CCGGGATCCGATGGTTTGAC<br>CGATTC  | Reverse primer for amplification of leuL attenuator region |
| thrA_fwd_gfp           | CCGCTCGAGACTGCAACGGGC<br>AATATG | Forward primer for amplification of thrL attenuator region |
| thrA_rev_gfp           | CCGGGATCCTCGGCATCGCTG<br>ATATTG | Reverse primer for amplification of thrL attenuator region |
